# Structure and conformational states of the bovine mitochondrial ATP synthase by cryo-EM

Anna Zhou<sup>1,2,\*</sup>, Alexis Rohou<sup>3,\*</sup>, Daniel G. Schep<sup>1,2</sup>, John V. Bason<sup>4</sup>, Martin G. Montgomery<sup>4</sup>, John E. Walker<sup>4</sup>, Nikolaus Grigorieff<sup>3</sup>, and John L. Rubinstein<sup>1,2,5</sup>

1. The Hospital for Sick Children Research Institute, Toronto, Canada
2. Department of Medical Biophysics, The University of Toronto, Canada
3. Howard Hughes Medical Institute, Janelia Research Campus, Ashburn, USA
4. MRC Mitochondrial Biology Unit, Cambridge, UK
5. Department of Biochemistry, The University of Toronto, Canada

\* These authors contributed equally to this work

Correspondence to: [john.rubinstein@utoronto.ca](mailto:john.rubinstein@utoronto.ca), [niko@grigorieff.org](mailto:niko@grigorieff.org), [walker@mrc-mbu.cam.ac.uk](mailto:walker@mrc-mbu.cam.ac.uk)

## Abstract

Adenosine triphosphate (ATP), the chemical energy currency of biology, is synthesized in eukaryotic cells primarily by the mitochondrial ATP synthase. ATP synthases operate by a rotary catalytic mechanism where proton translocation through the membrane-inserted  $F_0$  region is coupled to ATP synthesis in the catalytic  $F_1$  region via rotation of a central rotor subcomplex. We report here single particle electron cryomicroscopy (cryo-EM) analysis of the bovine mitochondrial ATP synthase. Combining cryo-EM data with bioinformatic analysis allowed us to determine the fold of the a subunit, suggesting a proton translocation path through the  $F_0$  region that involves both the a and b subunits. 3D classification of images revealed seven distinct states of the enzyme that show different modes of bending and twisting in the intact ATP synthase. Rotational fluctuations of the  $c_8$ -ring within the  $F_0$  region support a Brownian ratchet mechanism for proton-translocation driven rotation in ATP synthases.

## Introduction

In the mitochondria of eukaryotes, adenosine triphosphate (ATP) is produced by the ATP synthase, a ~600 kDa membrane protein complex composed of a soluble catalytic  $F_1$  region and a membrane-inserted  $F_0$  region. The ATP synthase is found in the inner membranes of mitochondria, with the  $F_1$  region in the mitochondrial matrix and the  $F_0$  region accessible from the inter-membrane space between the mitochondrial outer and inner membranes. In the mammalian enzyme the subunit composition is  $\alpha_3\beta_3\gamma\delta\epsilon$  for the  $F_1$  region with subunits a, e, f, g, A6L, DAPIT, a 6.8 kDa proteolipid, two membrane-inserted  $\alpha$ -helices of subunit b, and the  $c_8$ -ring forming the  $F_0$  region (1). The rotor subcomplex consists of subunits  $\gamma$ ,  $\delta$ ,  $\epsilon$ , and the  $c_8$ -ring. In addition to the rotor, the  $F_1$  and  $F_0$  regions are linked by a peripheral stalk composed of subunits OSCP, d,  $F_6$ , and the hydrophilic portion of subunit b. Approximately 85 % of the structure of the complex is known at high resolution from X-ray crystal structures of constituent domains, which have been assembled into a mosaic structure within the constraints of a cryo-EM map at 18 Å resolution (1, 2).

The proton motive force, established by the electron transport chain during cellular respiration, drives protons across the  $F_0$  region through the interface between the a subunit and the  $c_8$ -ring, inducing rotation of the rotor (3, 4). While the mechanism by which ATP synthesis and hydrolysis are coupled to rotation of the  $\gamma$  subunit is now understood well (1), it is still unresolved how rotation of the central rotor is coupled to proton translocation through the  $F_0$  region. The most popular model suggests that proton translocation occurs through two offset half channels near the a subunit/c subunit interface (5, 6). In this model, one half channel allows protons to move half-way across the lipid bilayer in order to protonate the conserved Glu58 residue of one of the c subunits. The other half channel allows deprotonation of an adjacent c subunit (7), setting up the necessary condition for a net rotation of the entire c-ring. Rotation does not occur directly from the protonating half channel to the deprotonating half channel, but in the opposite direction so that the protonated, and therefore uncharged, Glu residues traverse through the lipid environment before reaching the deprotonating half channel. The deprotonated Glu residue prevents the ring from rotating in the opposite direction, which would place the charged residue in the hydrophobic environment of the lipid bilayer. Rotation of the ring occurs due Brownian motion, making the enzyme a Brownian ratchet.

A recent cryo-EM map of the *Polytomella sp.* ATP synthase dimer showed two long and tilted  $\alpha$ -helices from the a subunit in contact with the  $c_{10}$ -ring of that species (8). This arrangement of  $\alpha$ -helices from the a and c subunits was also seen in the *Saccharomyces cerevisiae* V-type ATPase (9). Cryo-EM of the *S. cerevisiae* V-ATPase demonstrated that images of rotary ATPases could be separated by 3D classification to reveal conformations of the complex that exist simultaneously in solution. In the work described here, we obtained and analyzed cryo-EM images of the bovine mitochondrial ATP synthase. 3D classification of the images resulted in seven distinct maps of the enzyme, each showing the complex in a different conformation. By averaging the density for the proton-translocating a subunit from the seven maps, we generated a map segment that shows  $\alpha$ -helices clearly. Analysis of evolutionary covariance in the sequence of the a subunit (10) allowed the entire a subunit polypeptide to be traced through the density map. The resulting atomic model for the a subunit was fitted into the maps for the different rotational states, suggesting a path for protons through the enzyme and supporting the Brownian ratchet mechanism for the generation of rotation (5, 6), and thereby ATP synthesis, in the ATP synthase.

## Results

Specimens of ATP synthase were isolated from bovine heart mitochondria and prepared for cryo-EM as described previously (2, 11) (Fig.1 supplement 1). Initial 3D classification produced three classes, each of which appeared to show a  $\sim 120^\circ$  rotation of the central rotor within the  $F_1$  region of the complex (Fig. 1A, blue arrows), similar to what was seen previously with the *S. cerevisiae* V-ATPase (9). Further classification of these three rotational states was able to separate state 1 into two sub-states, subsequently referred to as states 1a and 1b. State 2 could be divided into states 2a, 2b, and 2c, while state 3 could be separated into states 3a and 3b. Each of these 3D classes shows a different conformation of the enzyme (Fig. 1 supplement 2 and Movie 1). While the

rotational states of the yeast V-ATPase were found to be populated unequally after 3D classification, bovine ATP synthase classes corresponding to different positions of the rotor had approximately equal populations. State 1 contained 43,039 particle images divided almost equally over its two sub-states, state 2 contained 48,053 particles images divided almost equally over its three sub-states, and state 3 contained 46,257 particle images divided almost equally over its two sub-states. The resolutions of the seven classes were between 6.4 and 7.4 Å (Fig. 1 supplement 3).

There is a distinct bend in the  $F_o$  region of the complex between the portion that is proximal to the  $c_8$ -ring and the portion that is distal to the  $c_8$ -ring (Fig. 1B and Fig. 1 supplement 2). This bent structure was seen previously in a lower-resolution cryo-EM map of the bovine mitochondrial ATP synthase (2). It is consistent with electron tomograms of ATP synthases in mitochondrial membranes (12, 13) and was also observed recently by electron tomography of membrane-reconstituted 2D crystals of the bovine enzyme (14). The e and g subunits are expected to reside in the portion of the  $F_o$  region distal to the  $c_8$ -ring because cryo-EM maps of the mitochondrial ATP synthase from *S. cerevisiae*, where subunits e and g were removed by detergent, lacked this bent portion (2, 15). The f subunit is also thought to be associated with the e and g subunits (16). DAPIT and the 6.8 kDa proteolipid are not expected to be present in this preparation because the necessary lipids for maintaining their association were not added during purification (17, 18). While a detergent micelle can be seen around the entire  $F_o$  region, the portion of  $F_o$  distal to the  $c_8$ -ring also contains a feature with unusually low density (Fig 1C, white arrows). The content of this low-density region is uncertain. The low density could be due to partial occupancy, flexibility, or disorder of a protein subunit. However, the low-density feature is bounded on one side by unusually sharp density from the detergent micelle, suggesting more order than in the rest of the micelle, and on the other side by the a subunit, which also appears well ordered. Instead, the low density could be due to bound material with low density, possibly lipid, that remains after purification of the enzyme.

### ***A novel feature in the $F_o$ region***

The  $F_o$  region of all seven maps also revealed a remarkable feature not resolved previously in cryo-EM maps of ATP synthases (2, 8, 15, 19). The feature appears to consist of an elongated membrane-embedded density, possibly an  $\alpha$ -helix, that extends from the rotor-distal portion of  $F_o$  to the  $c_8$ -ring. The orientation of this density would cause it to pass through the inter-membrane space of the mitochondrion (Fig. 1B and C, orange arrow). While not identified in the previous cryo-EM map of the enzyme at 18 Å resolution, the structure is consistent with a poorly-resolved ridge along the surface of  $F_o$  region seen in the earlier map (2). Because it extends from the bent end of the  $F_o$  region, this feature may correspond to the soluble part of the e subunit. Indeed, a similar structure was observed in single particle EM of negatively stained ATP synthase dimers from bovine heart mitochondria, and was proposed to be interacting e subunits (20). However, in the present structure the feature is not positioned to interact between dimers of the enzyme and its role in the complex remains unclear.

### ***Subunit a, b and A6L in the $F_o$ region***

In order to improve the signal-to-noise ratio for the  $F_o$  region of the complex, the membrane regions from the seven different maps were aligned and averaged. Averaging maps increases the signal-to-noise ratio where the structures are similar, but blurs regions where the maps differ. In principle, this method could also be applied to other map regions of the ATP synthase or other heterogeneous protein complexes by applying an appropriate transform before averaging. Averaging the  $F_o$  region provides a clear view of the portion of  $F_o$  region adjacent to the rotor, allowing the trans-membrane  $\alpha$ -helices from the a, b, and A6L subunits to be identified reliably (Fig. 1C and D, green arrows, and Fig. 2). The c-ring has a lower density in the averaged membrane region than in the original maps, suggesting that its position differs between maps (Fig. 1C and D, ping arrows). The averaged density for the  $F_o$  region revealed the a subunit to have five membrane-inserted  $\alpha$ -helices and an additional  $\alpha$ -helix along the plane of the membrane surface (Fig. 2). Three additional trans-membrane  $\alpha$ -helices are also apparent, presumably two from the b subunit (21) and one from the A6L subunit (22). The mammalian mitochondrial a subunit possesses the two highly tilted  $\alpha$ -helices in contact with the c-ring that were seen previously for the *Polytomella sp.* F-type ATP synthase (8) and *S. cerevisiae* V-ATPase (9) (Fig. 2A).

A model for the a subunit was built into the cryo-EM density map using constraints from analysis of evolutionary covariance in sequences of the a subunit from different species. Analysis of covariance in evolutionarily related protein sequences can identify pairs of residues in a protein structure that are likely to interact physically with each other (10, 23–25). Spatial constraints from covariance analysis were sufficient not only to identify tentatively trans-membrane  $\alpha$ -helices of the a subunit that are adjacent to each other, but also suggest which face each  $\alpha$ -helix presents to the other  $\alpha$ -helices (Fig. 2B and Movie 2, red lines). The constraints show patterns of interaction consistent with the predicted  $\alpha$ -helical structure of the a subunit (Fig. 2 supplement 1A), as well as interactions between the a subunit and the outer  $\alpha$ -helix of a c subunit in the  $c_8$ -ring (Fig. 2 supplement 1B). As a result, we were able to trace, we believe unambiguously, the path of the a subunit polypeptide through the cryo-EM density map. The fit of the  $\alpha$ -helices in the a subunit density was improved by molecular dynamics flexible fitting (*MDFF*) (26) and the 33 residue long connecting loop from residues 115 to 148 was built with *Rosetta* (27) (Fig. 2B and Movie 2). This connecting loop was built to be physically reasonable, but because its structure is not derived from experimental data it is not included in the discussion below. The final model places the  $\alpha$  carbons of the residues in the co-varying pairs within 15 Å of each other in 94 % of the top 90 identified pairs, with an average  $C_\alpha$  to  $C_\alpha$  distance of 10.3 Å. The 6 % of constraints that are violated by the model are consistent with the false positive rate observed when testing covariance analysis approaches with proteins of known structure (28).

### ***Description of the a subunit structure***

The mammalian a subunit appears to consist of six  $\alpha$ -helices, with five  $\alpha$ -helices that penetrate into the membrane-inserted portion of the enzyme (Fig. 2C). The N terminus of the subunit is in the inter-membrane space of the mitochondrion. The first  $\alpha$ -helix



extends vertically across the  $F_0$  region distal to the contact of the a subunit and  $c_8$ -ring. The two trans-membrane  $\alpha$ -helices of the b subunit are packed against one surface of helix #1 while the single trans-membrane  $\alpha$ -helix from the A6L subunit is packed against its opposite surface. The second density region, interpreted as an  $\alpha$ -helix of the a subunit, is not membrane-inserted and extends along the matrix surface of the  $F_0$  region connecting the membrane-inserted  $\alpha$ -helix #1 with a membrane-inserted helical-hairpin composed of  $\alpha$ -helices #3 and #4. This hairpin of the third and fourth  $\alpha$ -helices does not appear to cross the  $F_0$  region fully, as seen previously in the *Polytomella sp.* ATP synthase (8). The final two trans-membrane helices are the two highly tilted  $\alpha$ -helices seen previously with the *Polytomella sp.* ATP synthase and *S. cerevisiae* V-ATPase, with the C terminus of the a subunit on the matrix side of the  $F_0$  region. Within this structure, Arg159, which is essential and completely conserved, is found near the middle of the long tilted  $\alpha$ -helix nearer the inter-membrane space side of the  $F_0$  region, different from its predicted position in the *Polytomella sp.* enzyme (8).

### ***Docking of atomic models into the cryo-EM maps***

To analyze the different enzyme conformations detected by 3D classification, the maps were segmented and available crystal structures for the  $F_1$ : $IF_1$  complex (29),  $F_1$  peripheral stalk complex (30), peripheral stalk alone (31), and  $F_1$ - $c_8$  complex (32) were combined into each of the maps by *MDFF* (26). Residues for the b subunit were extended from the N terminus of the b subunit crystal structure into the membrane region based on trans-membrane  $\alpha$ -helix prediction. While *MDFF* with maps in this resolution range cannot be used to determine the locations or conformations of amino acid side chains, loops, or random-coil segments of models, it can show the positioning of  $\alpha$ -helices in the structures. Figures 3A and B compare the fitting for state 1a (Fig. 3A) and state 1b (Fig. 3B), illustrating the accuracy with which  $\alpha$ -helical segments could be resolved in the maps of different sub-states. The atomic model alone for state 1a is shown in Figure 3C, with the  $c_8$ -ring removed for clarity in Figure 3D. Transitions between the different states were illustrated by linear interpolation (Movie 3). As seen previously for the *S. cerevisiae* V-ATPase, almost all of the subunits in the enzyme undergo conformational changes on transition between states (9). Because there were two sub-states identified for states 1 and 3 there is only a single sub-state to sub-state transition for these two states. In comparison, three different sub-states were identified for state 2 and consequently there are three sub-state to sub-state transitions that are possible for this state. All of the sub-state to sub-state transitions include a slight rotation of the  $c_8$ -ring against the a subunit. It is possible that this movement is due to partial disruption of the subunit a/ $c_8$ -ring interface. However, the structural differences within the  $F_0$  regions of different classes are significantly smaller than the structural differences seen elsewhere in the enzyme, suggesting that these changes do not originate from disruption within the membrane region of the complex and instead reflect flexibility in the enzyme.

The largest change between the sub-states of each state can be approximated by rotations of the  $\alpha_3\beta_3$  hexamer relative to the rest of the complex by angles ranging from 10 to 16°. A comparison of the maps for the different sub-states and the axes of these rotations are shown in Figure 3 supplement 1. The resulting conformational changes can be seen most

clearly in Movies 4 and 5. The state 1a to 1b transition reveals a bending of the peripheral stalk towards the top of the  $F_1$  region near the OSCP and  $F_6$  subunits (Movies 4 and 5, panel A). In comparison, the state 3a to 3b transition reveals bending of the peripheral stalk near where the b subunit enters the membrane (Movies 4 and 5, panel D).

Transitions between the three sub-states of state 2 show both motions: the transition between 2a and 2b shows mostly bending of the peripheral stalk near OSCP and  $F_6$  subunits while the 2b and 2c transition shows mostly bending near the membrane-inserted portion of the peripheral stalk (Movies 4 and 5, panels B and C, respectively). The transition from state 2a to 2c shows a combined bending at both of these positions. It is most likely that the different modes of bending exist in all of the states and further classification of larger datasets would be expected to reveal these complex motions. The different sub-states do not appear to have a specific sequence or represent specific intermediates in the rotation sequence. Instead, the differences in conformation between sub-states when taken together illustrate the flexibility of the enzyme, a property that has been linked to its rapid rate of enzymatic activity (9, 33). The functional significance of the sub-states may also be determined by the orientation of the  $c_8$ -ring with respect to the a subunit, as discussed below.

## Discussion

Predicting the path of protons through membrane protein complexes has proven difficult, even in cases where high-resolution atomic models including bound water molecules are available from X-ray crystallography (34). Nonetheless, features in the structure of the bovine mitochondrial  $F_0$  region suggest a possible path for proton translocation similar to a model put forward based on the structure of the *Polytomella sp.* ATP synthase (8). The arrangement of  $\alpha$ -helices in the  $F_0$  region is remarkably similar to the arrangement of  $\alpha$ -helices in the  $V_0$  region of the yeast V-ATPase (9), even though the V-ATPase a subunit has eight  $\alpha$ -helices and little detectable sequence similarity with the F-type ATP synthase a subunit. The conserved general architecture of the membrane-inserted regions in F-type ATP synthases and V-type ATPases suggests that the observed arrangement of  $\alpha$ -helices is functionally important and likely involved in proton translocation (Fig. 4A and B). The matrix half channel of the ATP synthase is likely to be formed by the cavity between the  $c_8$ -ring and the matrix ends of tilted  $\alpha$ -helices #5 and #6 of the a subunit. The luminal half channel in the V-ATPase is probably formed entirely from  $\alpha$ -helices from the a subunit, whereas the corresponding inter-membrane space half channel in the ATP synthase is likely composed of the inter-membrane space ends of  $\alpha$ -helices #5 and #6 and one or both of the two trans-membrane  $\alpha$ -helices of the b subunit. Defining the exact placement of half channels will likely require higher-resolution maps from cryo-EM or X-ray crystallography that reveal amino acid side chain density and bound water molecules.

In addition to bending and twisting of the peripheral stalk and central rotor of the enzyme, the differences between the sub-states of each state show variability in the rotational position of the  $c_8$ -ring in relation to the a subunit (Fig. 4C and D), even in the nucleotide-depleted conditions in which cryo-EM grids were frozen for this analysis. This lack of a rigid interaction between the  $c_8$ -ring and a subunit is consistent with the Brownian ratchet model of proton translocation (5). In the Brownian ratchet model, the rotational position of the ring fluctuates due to Brownian motion, but cannot turn to place

the Glu58 residue of a c subunit into the hydrophobic environment of the lipid bilayer until the Glu58 is protonated by the inter-membrane space half-channel. Therefore, with this model, the different sub-states would correspond to energetically equivalent or nearly-equivalent conformations that occur due to Brownian motion. Movie 6 illustrates the extent of rotational oscillation predicted from the transition between states 2a and 2c. It is most likely that this oscillation occurs as each c subunit passes the interface with the a subunit, with 8/3 c subunits on average contributing to the synthesis of one ATP molecule. The rotational flexibility of the  $c_8$ -ring that exists even when the  $\gamma$  subunit is locked within the  $\alpha_3\beta_3$  hexamer suggests that flexing and bending of the components of the ATP synthase smooths the coupling of the 8-step rotation of the  $c_8$ -ring with the 3-step rotation of the  $F_1$  region. This model suggests that the observed flexibility in the enzyme, which apparently complicates determination of atomic resolution structures directly from cryo-EM data, is also essential to the mechanism of ATP synthesis.

## Methods

### *Protein purification and electron microscopy*

Bovine mitochondrial ATP synthase was purified as described previously (11) and cryo-EM specimen grids were prepared as described previously, except that glycerol was removed from specimens prior to grid freezing with a 7 kDa molecular weight cutoff Zeba Spin centrifuged desalting column (Thermo Scientific) and nano-fabricated grids with 500 nm holes were used (35). After optimization of grid freezing conditions, micrographs were recorded from three grids on a Titan Krios microscope (FEI) operated at 300 kV with parallel illumination of a 2.5  $\mu\text{m}$  diameter area of the specimen and an electron fluency of 3  $\text{el}/\text{\AA}^2/\text{s}$ . A 70  $\mu\text{m}$  objective aperture was employed with a nominal magnification of 18,000 $\times$  onto a K2 Summit direct detector device (Gatan Inc.) operated in super-resolution mode with a 1.64  $\text{\AA}$  physical pixel and 0.82  $\text{\AA}$  super-resolution pixel. With no specimen present, the rate of exposure of the detector was 8  $\text{el}/\text{pixel}/\text{s}$ . Exposure-fractionated movies of 20.1 s were recorded as stacks of 67 frames, so that selected specimen areas were exposed with a total of 60.3  $\text{el}/\text{\AA}^2$ . Data collection was automated with *SerialEM* (36).

### *Image processing*

Magnification anisotropy (37) under the conditions described above was measured previously from images of a standard cross-grating specimen with the program *mag\_distortion\_estimate* (38). The linear scaling parameters were 0.986 and 1.013, the azimuth of the distortion was 134.0 $^\circ$ , and the program *mag\_distortion\_correct* was used to correct for this distortion in each dose-fractionated frame. The frames were then down-sampled to a pixel size of 1.64  $\text{\AA}$  by Fourier-space cropping and aligned with each other with the program *Unblur* (39). Defocus parameters were estimated from aligned sums of frames using *CTFFIND4* (40). Particle images were selected in *Relion* and subjected to 2D classification (41, 42), yielding a set of 195,233 single particle coordinates selected from 5,825 movies. Local beam-induced motion was corrected for each particle with the program *alignparts\_lmbfgs* (43). Aligned dose-fractionated particle images were filtered and summed to optimize the signal-to-noise ratio at all spatial frequencies (39, 43, 44), giving a set of particle images that were 256 $\times$ 256 pixels. These images were down-sampled to 128 $\times$ 128 pixels (pixel size of 3.28  $\text{\AA}$ ) for determining particle orientations.

Initial single-particle alignment parameter values were obtained by 5 rounds of iterative grid search and reconstruction in *FREALIGN*'s mode 3 (45), using the earlier published map of the enzyme as an initial reference (2). *FREALIGN*'s likelihood-based classification algorithm (46) was then used to classify particles images into several maps, alternating between refinement of orientation parameters every 3<sup>rd</sup> or 4<sup>th</sup> iteration and class occupancy during other iterations. The final classification yielded 12 classes, of which 7 gave interpretable 3D maps. Only spatial frequencies up to 1/10 Å<sup>-1</sup> were used during refinement to avoid fitting noise to high-resolution features in maps. All seven 3D maps had Fourier shell correlation values greater than 0.8 at this frequency.

### *Map analysis and model building*

Segmentation of 3D maps was performed with *UCSF Chimera* (47, 48) and atomic structures were fit flexibly into 3D maps using *NAMD* with Molecular Dynamics Flexible Fitting (*MDFF*) (26). The F<sub>0</sub> regions from the seven different 3D maps were aligned and averaged in real space with *UCSF Chimera* and *Situs* (49). Co-varying pairs of residues were detected in the full bovine mitochondrial ATP synthase a subunit sequence (NCBI reference YP\_209210.1) with the program *EVcouplings* (24) using a pseudo-likelihood maximization approach and the top 90 connections were considered in the analysis. The protein was not assumed to have trans-membrane  $\alpha$ -helices and the job was run as a quick launch with all other parameters at default settings. Evolutionary couplings between the a subunit and ATP synthase c subunit were detected with *GREMLIN* (25) with an E-value threshold for multiple sequence alignments (MSAs) of  $1 \times 10^{-10}$  and *Jackhammer* was used to produce MSAs over 8 iterations.

To build a model of the a subunit, six straight  $\alpha$ -helices ( $\phi = -57^\circ$  and  $\psi = -47^\circ$ ) were built in *UCSF Chimera*. These  $\alpha$ -helices were fit manually in the map of the average F<sub>0</sub> region in the only orientations that satisfied constraints from evolutionary covariance analysis. For illustration, but not interpretation, loops connecting these helices were also included in the model. Randomly structured connecting loops between the  $\alpha$ -helices were built in *Modeller* (50) within *UCSF Chimera* and fitted into the density with *MDFF* with a low density scaling factor (gscale=0.3) over 200,000 steps (200 ps). Bond lengths and angles were then idealized with *Rosetta* (idealize\_jd2 command) and the loop between residues 115 and 148 rebuilt in *Rosetta* (loopmodel command) using the quick\_ccd method of remodelling (51). Each output structure included an all-atom relaxation in the density map with a score weight of 0.1. The lowest energy models of 100 models was selected and angles were idealized and the structure energy-minimized with *UCSF Chimera*. Loops beside the one from residues 115 and 148 were too short for this process to be useful. The b subunit crystal structure was extended into the F<sub>0</sub> region of the map based on trans-membrane  $\alpha$ -helix prediction from MEMSAT-SVM (52).

### **Acknowledgements**

We thank Richard Henderson and Voula Kanelis for a critical reading of this manuscript. A preprint of this manuscript was first deposited on bioRxiv.org (<http://dx.doi.org/10.1101/023770>) on August 11, 2015. This work was supported by operating grant MOP 81294 from the Canadian Institutes of Health Research (JLR) and

Medical Research Council grant U105663150 (JW). AZ was supported by a postgraduate scholarship from the Canadian Institutes of Health Research, an award from The Hospital for Sick Children, and a U of T excellence award. DGS was supported by a postgraduate scholarship from the Natural Sciences and Engineering Research Council and an award from The Hospital for Sick Children. JLR holds the Canada Research Chair in Electron Cryomicroscopy.

### Author contributions

JW, NG, and JLR initiated the project. JVB and MGM purified the protein. AZ prepared specimens, performed automated particle picking, segmented maps, docked atomic models into maps, and analyzed conformational states. AR imaged the specimens and calculated 3D maps. DGS built the atomic model of the a subunit using information from evolutionary covariance and *Rosetta*. JLR, NG, and JW supervised the research.

### Author information

Cryo-EM maps have been deposited in the Electron Microscopy Data Bank with accession numbers EMDB-3164 to 3170. Atomic models have been deposited in the Protein Data Bank with accession numbers 5ARA, 5ARE, 5ARH, 5ARI, 5FIJ, 5FIK, and 5FIL. The authors declare no competing interests, financial or otherwise.

### Figure Captions

**Figure 1. Cross-sections through maps.** **A**, Cross-sections through the  $F_1$  regions of the different maps show that states 1, 2, and 3 are related by  $\sim 120^\circ$  rotations of the  $\gamma$  subunit within the  $\alpha_3\beta_3$  hexamer. **B**, Surface rendering of a map (State 1a) shows the bent  $F_0$  region with a tubular feature that extends from the rotor-distal portion to the  $c_8$ -ring (orange arrow). **C**, Cross-sections through the  $F_0$  region shows  $\alpha$ -helices from the a, b and A6L subunits (green arrows), a large low density region in the rotor-distal portion (white arrow), and the extension from the rotor-distal portion to the rotor (orange arrow). **D**, Averaging the  $F_0$  regions from the seven different maps shows all of the features mentioned above with an improved signal-to-noise ratio. Scale bars, 25 Å.

**Figure 2. 3D structure of the  $F_0$  region.** **A**, In the  $F_0$  region of the complex, density was segmented for the a subunit (green), the b subunit (red-brown), the A6L subunit (blue), and the structure thought to arise from subunits e and g (orange). **B**, The a subunit sequence could be placed unambiguously into the cryo-EM density (green) by including constraints for residues predicted to be near to each other due to evolutionary covariance (red lines). **C**, The a subunit (coloured with a gradient from blue to red to denote directionality from the N to C terminus) possesses six  $\alpha$ -helices, numbered 1-6. Trans-membrane  $\alpha$ -helices from subunits b and A6L are shown as volumes (red-brown and blue, respectively). Five of the  $\alpha$ -helices of subunit a are membrane-inserted while helix #2 runs along the matrix surface of the  $F_0$  region. The N terminus of the a subunit is on the inter-membrane space side of the subunit while the C terminus is on the matrix side. The highly conserved residue Arg159 is on the elongated and highly tilted  $\alpha$ -helix #6. Scale bar, 25 Å.



**Figure 3. Docking of atomic models into the cryo-EM maps.** Fitting of all available atomic models into the density map is shown for state 1a (**A**) and state 1b (**B**). State 1a is also shown in a different orientation and without the density map (**C**) and with the  $c_8$ -ring removed for clarity (**D**). The apparent gap between the  $c_8$ -ring and  $\gamma$  and  $\delta$  subunits is filled with amino acid side chains and is the same as was seen in the crystal structure of the  $F_1$ - $c_8$  complex (32). Scale bar, 25 Å.

**Figure 4. Model for proton translocation.** **A**, The a subunit, along with the membrane-intrinsic  $\alpha$ -helices of the b subunit, form two clusters that could be the half channels needed for trans-membrane proton translocation. **B**, The map segment corresponding to the  $c_8$ -ring is shown for state 2a (pink) and state 2c (purple). The difference in rotational position of the ring is consistent with the Brownian fluctuations predicted for the generation of a net rotation. Scale bar, 25 Å.

**Movie 1. Slices through the seven cryo-EM maps.** Cross-sections are shown moving from the  $F_1$  region towards the  $F_0$  region for states 1a, 1b, 2a, 2b, 2c, 3a, and 3b.

**Movie 2. Fold of the a subunit.** The density corresponding to the a subunit (green) and membrane-inserted portion of the b subunit (red-brown) and A6L subunit (blue) are shown, in addition to a ribbon diagram for the a subunit (green) and the top 90 constraints from analysis of covarying residues in the a subunit sequence (red lines). 6 % of the constraints could not be satisfied, which is consistent with the false positive rate from known structures (28). Scale bar, 25 Å.

**Movie 3. Conformation changes during the rotary cycle.** Linear interpolation is shown between one of each of the main states identified by 3D classification (state 1a, 2a, and 3a) showing the large conformation changes that occur during rotation. Scale bar, 25 Å. [*please view movie as loop*]

**Movie 4. Conformational differences between the different ATP synthase maps.** Differences between conformations detected by 3D classification are illustrated by linear interpolation between state 1a and 1b, showing bending of the peripheral stalk near the OSCP and  $F_6$  subunits (**A**), state 2a and 2b showing a similar bending of the peripheral stalk near the OSCP and  $F_6$  subunits (**B**), state 2b and 2c showing bending of the peripheral stalk near the membrane region (**C**), and state 3a and 3b showing a similar bending of the peripheral stalk near the membrane region (**D**). Scale bar, 25 Å. [*please view movie as loop*]

**Movie 5. Conformational differences between the different ATP synthase maps.** The same interpolations as shown in movie 4, except viewed from the  $F_1$  region towards the  $F_0$  region. Scale bar, 25 Å. [*please view movie as loop*]

**Movie 6. Brownian ratcheting.** The different rotational positions of the  $c_8$ -ring between the sub-states are illustrated by interpolating between the positions of states 2a and 2c. The conserved residue Arg159 is shown as a blue sphere. The movement is consistent with the Brownian ratcheting predicted during proton translocation in rotary ATPases.

Glu58 residues are shown moving from the proton-locked conformation (53) to an open conformation (54, 55) when they are close to the conserved Arg159 residue. Scale bar, 25 Å. [please view movie as loop]

**Figure 1 supplement 1. Electron microscopy and model construction.** **A**, A sample micrograph with representative ATP synthase particles circled in blue. Scale bar, 500 Å. **B**, A sample micrograph power spectrum with the modeled power spectrum from *CTFFIND4* in the lower left quadrant. **C**, Representative averages from 2D classes selected for 3D analysis. **D**, An example of individual particle trajectories (exaggerated by a factor of 5) from *alignparts\_lmbfgrs* used for local drift correction. **E**, The distribution of Euler angles assigned to particles going into the 3D maps shows preferred orientations but contains sufficient particle views to produce maps with isotropic resolution.

**Figure 1 supplement 2. The seven observed states of the bovine mitochondrial ATP synthase.** Two views are shown for each of the seven conformations identified for the enzyme. All of the known structural features and the newly observed protuberance from the rotor-distal portion of the  $F_o$  region are seen in each map. The bend in the  $F_o$  region is indicated by the dashed line in the top left map. Scale bar, 25 Å.

**Figure 1 supplement 3. Fourier shell correlation curves for the seven maps.** FSC curves are shown for state 1a and 1b (**A**), state 2a, 2b, and 2c (**B**), and state 3a and 3b (**C**).

**Figure 2 supplement 1. Analysis of evolutionary covariance of residues.** **A**, The top 90 predicted couplings between residues of the a subunit are indicated, along with trans-membrane helices predicted by the MEMSAT-SVM algorithm (52), shown in green, and highly conserved residues, shown in red. Residues modeled as membrane-inserted  $\alpha$ -helices based on the cryo-EM density are indicated with dark blue rectangles outside of the sequence and residues modeled as a soluble  $\alpha$ -helix based on the cryo-EM density is indicated with a light blue rectangle. **B**, The top six predicted couplings between residues of the a subunit and residues on the outer surface of the c-ring are indicated.

**Figure 3 supplement 1. Differences between sub-states.** The differences between sub-states can be seen by overlaying maps and models for state 1a (red) and 1b (green) (**A**), 2a (red) and 2b (green) (**B**), 2b (red) and 2c (green) (**C**), and 3a (red) and 3b (green) (**D**). These differences can be represented approximately as a rigid body rotation of the  $\alpha_3\beta_3$  hexamer by 10° (state 1a to 1b), 11° (state 2a to 2b), 12° (state 2b to 1c), and 16° (state 3a to 3b). The axes of these rotations are shown as black rods. This movement is most easily seen in Movies 4 and 5. Scale bar, 25 Å.

## References

1. Walker JE (2013) Keilin Memorial Lecture: The ATP synthase : the understood, the uncertain and the unknown. *Biochem Soc Trans* 41:1–16.
2. Baker LA, Watt IN, Runswick MJ, Walker JE, Rubinstein JL (2012) Arrangement of subunits in intact mammalian mitochondrial ATP synthase determined by cryo-EM. *Proc Natl Acad Sci U S A* 109:11675–11680.
3. Boyer PD (1997) The ATP synthase--a splendid molecular machine. *Annu Rev Biochem* 66:717–749.
4. Walker JE (1998) ATP synthesis by rotary catalysis (Nobel Lecture). *Angew Chemie-International Ed* 37:2309–2319.
5. Junge W, Lill H, Engelbrecht S (1997) ATP synthase: an electrochemical transducer with rotatory mechanics. *Trends Biochem Sci* 22:420–423.
6. Junge W, Nelson N (2005) Structural biology. Nature's rotary electromotors. *Science (80- )* 308:642–644.
7. Lau WCY, Rubinstein JL (2012) Subnanometre-resolution structure of the intact *Thermus thermophilus* H<sup>+</sup>-driven ATP synthase. *Nature* 481:214–8.
8. Allegretti M et al. (2015) Horizontal membrane-intrinsic  $\alpha$ -helices in the stator a-subunit of an F-type ATP synthase. *Nature* 521:237–40.
9. Zhao J, Benlekbir S, Rubinstein JL (2015) Electron cryomicroscopy observation of rotational states in a eukaryotic V-ATPase. *Nature* 521:241–245.
10. Göbel U, Sander C, Schneider R, Valencia A (1994) Correlated mutations and residue contacts in proteins. *Proteins* 18:309–317.
11. Runswick MJ et al. (2013) The affinity purification and characterization of ATP synthase complexes from mitochondria. *Open Biol* 3:120160.
12. Strauss M, Hofhaus G, Schröder RR, Kühlbrandt W (2008) Dimer ribbons of ATP synthase shape the inner mitochondrial membrane. *EMBO J* 27:1154–1160.
13. Davies KM et al. (2011) Macromolecular organization of ATP synthase and complex I in whole mitochondria. *Proc Natl Acad Sci U S A* 108:14121–14126.
14. Jiko C et al. (2015) Bovine F<sub>1</sub>F<sub>0</sub> ATP synthase monomers bend the lipid bilayer in 2D membrane crystals. *Elife* 4:1–18.

15. Lau WCY, Baker LA, Rubinstein JL (2008) Cryo-EM structure of the yeast ATP synthase. *J Mol Biol* 382:1256–1264.
16. Belogradov GI, Tomich JM, Hatefi Y (1996) Membrane Topography and Near-neighbor Relationships of the Mitochondrial ATP Synthase Subunits e, f, and g\*. *J Biol Chem* 271:20340–20345.
17. Chen R, Runswick MJ, Carroll J, Fearnley IM, Walker JE (2007) Association of two proteolipids of unknown function with ATP synthase from bovine heart mitochondria. *FEBS Lett* 581:3145–3148.
18. Carroll J, Fearnley IM, Wang Q, Walker JE (2009) Measurement of the molecular masses of hydrophilic and hydrophobic subunits of ATP synthase and complex I in a single experiment. *Anal Biochem* 395:249–255.
19. Rubinstein JL, Walker JE, Henderson R (2003) Structure of the mitochondrial ATP synthase by electron cryomicroscopy. *EMBO J* 22:6182–6192.
20. Minauro-Sanmiguel F, Wilkens S, García JJ (2005) Structure of dimeric mitochondrial ATP synthase: novel F<sub>0</sub> bridging features and the structural basis of mitochondrial cristae biogenesis. *Proc Natl Acad Sci U S A* 102:12356–12358.
21. Walker JE, Runswick MJ, Poulter L (1987) ATP synthase from bovine mitochondria. The characterization and sequence analysis of two membrane-associated sub-units and of the corresponding cDNAs. *J Mol Biol* 197:89–100.
22. Fearnley IM, Walker JE (1986) Two overlapping genes in bovine mitochondrial DNA encode membrane components of ATP synthase. *EMBO J* 5:2003–2008.
23. Cronet P, Sander C, Vriend G (1993) Modeling of transmembrane seven helix bundles. *Protein Eng* 6:59–64.
24. Hopf T a. et al. (2012) Three-dimensional structures of membrane proteins from genomic sequencing. *Cell* 149:1607–1621.
25. Ovchinnikov S, Kamisetty H, Baker D (2014) Robust and accurate prediction of residue-residue interactions across protein interfaces using evolutionary information. *Elife* 2014:1–21.
26. Trabuco LG, Villa E, Mitra K, Frank J, Schulten K (2008) Flexible fitting of atomic structures into electron microscopy maps using molecular dynamics. *Structure* 16:673–683.
27. Rohl C a., Strauss CEM, Misura KMS, Baker D (2004) Protein Structure Prediction Using Rosetta. *Methods Enzymol* 383:66–93.

28. Marks DS et al. (2011) Protein 3D structure computed from evolutionary sequence variation. *PLoS One* 6:e28766.
29. Gledhill JR, Montgomery MG, Leslie AGW, Walker JE (2007) How the regulatory protein, IF(1), inhibits F(1)-ATPase from bovine mitochondria. *Proc Natl Acad Sci U S A* 104:15671–15676.
30. Rees DM, Leslie AG, Walker JE (2009) The structure of the membrane extrinsic region of bovine ATP synthase. *Proc Natl Acad Sci U S A* 106:21597–21601.
31. Dickson VK, Silvester J a, Fearnley IM, Leslie AGW, Walker JE (2006) On the structure of the stator of the mitochondrial ATP synthase. *EMBO J* 25:2911–2918.
32. Watt IN, Montgomery MG, Runswick MJ, Leslie AG, Walker JE (2010) Bioenergetic cost of making an adenosine triphosphate molecule in animal mitochondria. *Proc Natl Acad Sci U S A* 107:16823–16827.
33. Zhou M et al. (2014) Ion mobility-mass spectrometry of a rotary ATPase reveals ATP-induced reduction in conformational flexibility. *Nat Chem* 6:208–15.
34. Hosler JP, Ferguson-Miller S, Mills D a (2006) Energy transduction: proton transfer through the respiratory complexes. *Annu Rev Biochem* 75:165–187.
35. Marr CR, Benlekber S, Rubinstein JL (2014) Fabrication of carbon films with approximately 500 nm holes for cryo-EM with a direct detector device. *J Struct Biol* 185:42–47.
36. Mastronarde DN (2005) Automated electron microscope tomography using robust prediction of specimen movements. *J Struct Biol* 152:36–51.
37. Zhao J, Brubaker MA, Benlekber S, Rubinstein JL (2015) Description and comparison of algorithms for correcting anisotropic magnification in cryo-EM images. *J Struct Biol* **In Press**. ([doi:10.1016/j.jsb.2015.06.014](https://doi.org/10.1016/j.jsb.2015.06.014))
38. Grant T, Grigorieff N (2015) Automatic estimation and correction of anisotropic magnification distortion in electron microscopes. *J Struct Biol* **In Press**. ([doi:10.1016/j.jsb.2015.08.006](https://doi.org/10.1016/j.jsb.2015.08.006))
39. Grant T, Grigorieff N (2015) Measuring the optimal exposure for single particle cryo-EM using a 2.6 Å reconstruction of rotavirus VP6. *Elife* 4:1–19.
40. Rohou A, Grigorieff N (2015) CTFFIND4: Fast and accurate defocus estimation from electron micrographs. *J Struct Biol* **In Press**. ([doi:10.1016/j.jsb.2015.08.008](https://doi.org/10.1016/j.jsb.2015.08.008))
41. Scheres SHW (2015) Semi-automated selection of cryo-EM particles in RELION-1.3. *J Struct Biol* 189:114–122.



42. Scheres SHW (2012) RELION: implementation of a Bayesian approach to cryo-EM structure determination. *J Struct Biol* 180:519–530.
43. Rubinstein JL, Brubaker M a. (2015) Alignment of cryo-EM movies of individual particles by optimization of image translations. *J Struct Biol* **In Press**. ([doi:10.1016/j.jsb.2015.08.007](https://doi.org/10.1016/j.jsb.2015.08.007))
44. Baker LA, Smith EA, Bueler SA, Rubinstein JL (2010) The resolution dependence of optimal exposures in liquid nitrogen temperature electron cryomicroscopy of catalase crystals. *J Struct Biol* 169:431–437.
45. Grigorieff N (2007) FREALIGN: high-resolution refinement of single particle structures. *J Struct Biol* 157:117–125.
46. Lyumkis D, Brilot AF, Theobald DL, Grigorieff N (2013) Likelihood-based classification of cryo-EM images using FREALIGN. *J Struct Biol* 183:377–388.
47. Goddard TD, Huang CC, Ferrin TE (2007) Visualizing density maps with UCSF Chimera. *J Struct Biol* 157:281–287.
48. Pintilie GD, Zhang J, Goddard TD, Chiu W, Gossard DC (2010) Quantitative analysis of cryo-EM density map segmentation by watershed and scale-space filtering, and fitting of structures by alignment to regions. *J Struct Biol* 170:427–438.
49. Wriggers W, Milligan R a, McCammon J a (1999) Situs: A package for docking crystal structures into low-resolution maps from electron microscopy. *J Struct Biol* 125:185–195.
50. Eswar N et al. (2006) Comparative protein structure modeling using Modeller. *Curr Protoc Bioinformatics* Chapter 5:Unit 5.6.
51. DiMaio F, Tyka MD, Baker ML, Chiu W, Baker D (2009) Refinement of Protein Structures into Low-Resolution Density Maps Using Rosetta. *J Mol Biol* 392:181–190.
52. Nugent T, Jones DT (2009) Transmembrane protein topology prediction using support vector machines. *BMC Bioinformatics* 10:159.
53. Pogoryelov D, Yildiz O, Faraldo-Gomez JD, Meier T (2009) High-resolution structure of the rotor ring of a proton-dependent ATP synthase. *Nat Struct Mol Biol* 16:1068–1073.
54. Pogoryelov D et al. (2010) Microscopic rotary mechanism of ion translocation in the F(o) complex of ATP synthases. *Nat Chem Biol* 6:891–899.

55. Symersky J, Osowski D, Walters DE, Mueller DM (2012) Oligomycin frames a common drug-binding site in the ATP synthase. *Proc Natl Acad Sci* 109:13961–13965.

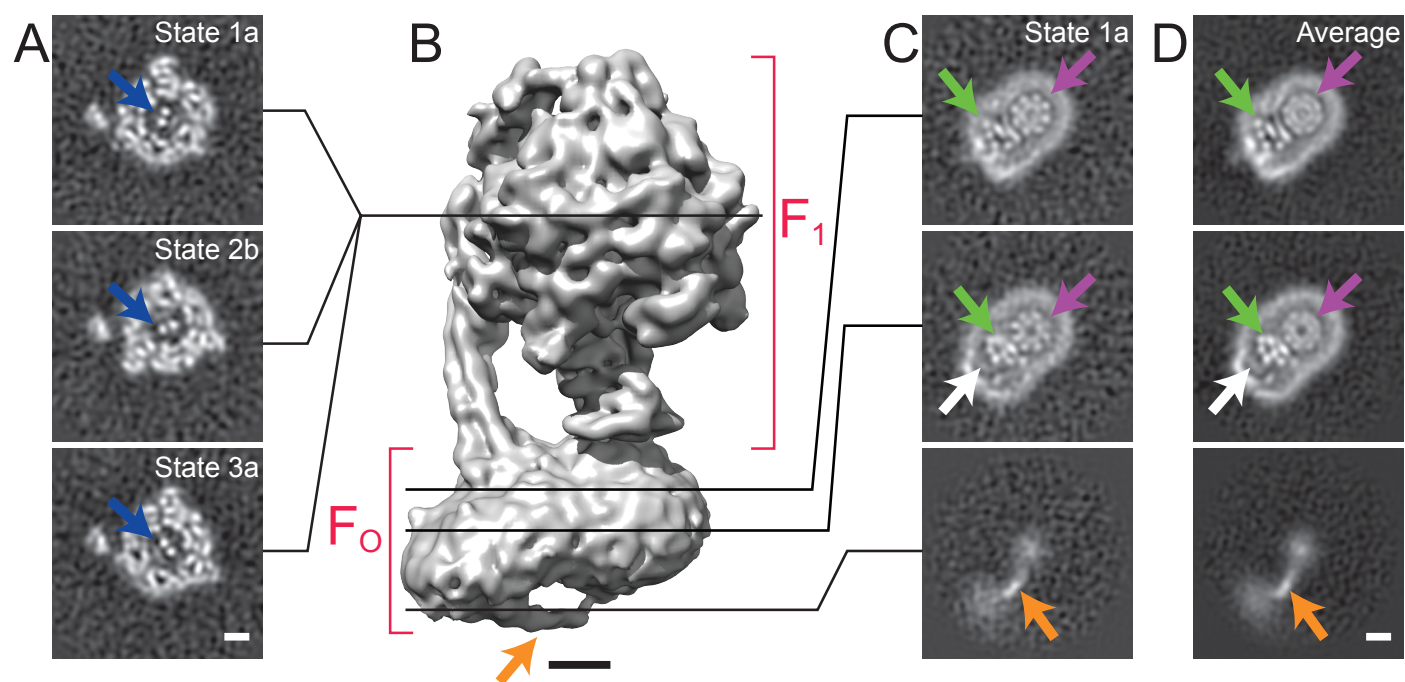

Figure 1

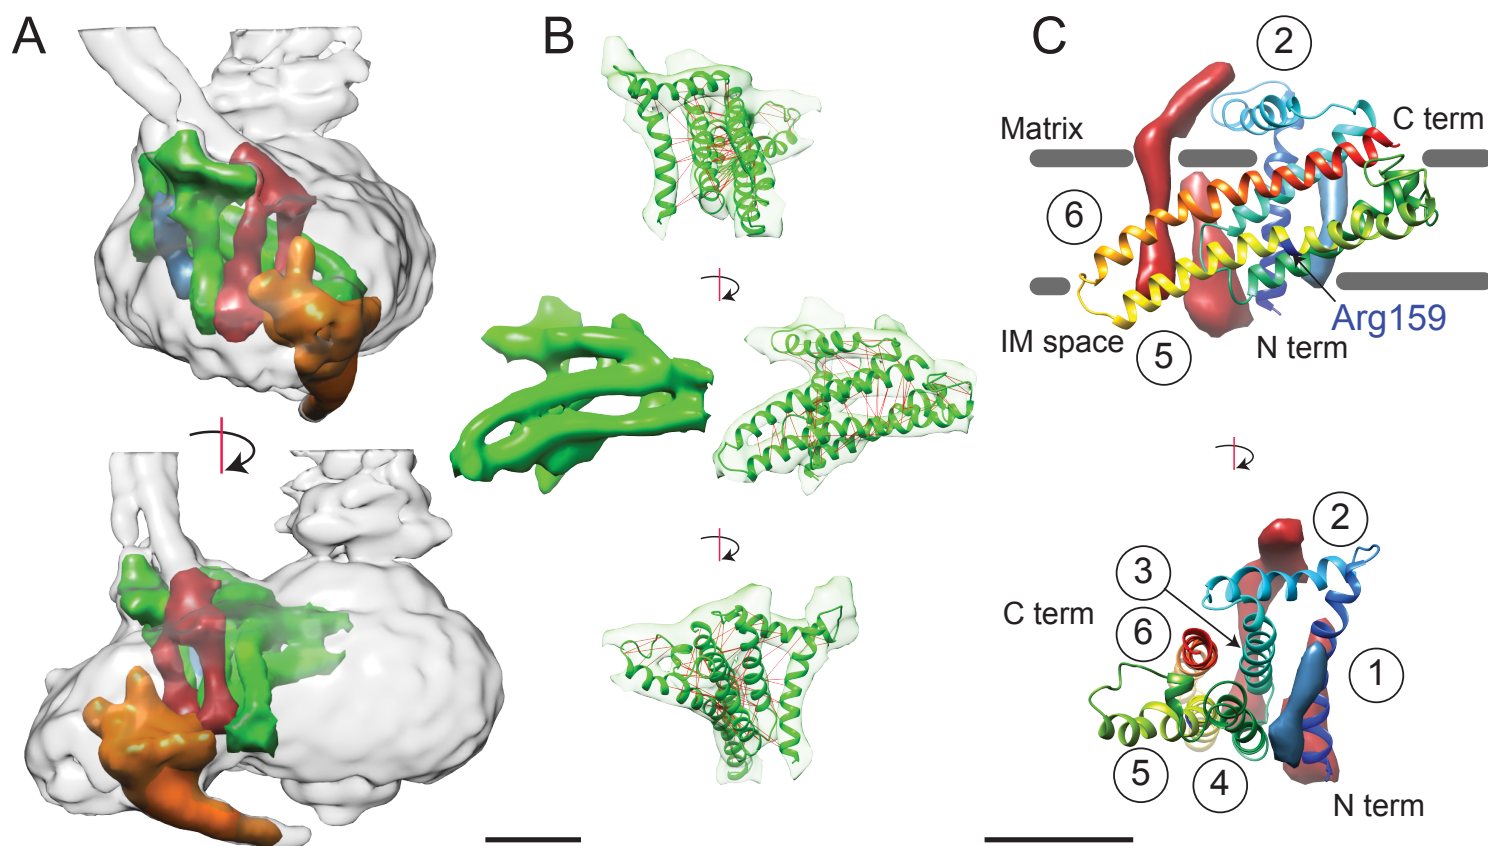

Figure 2

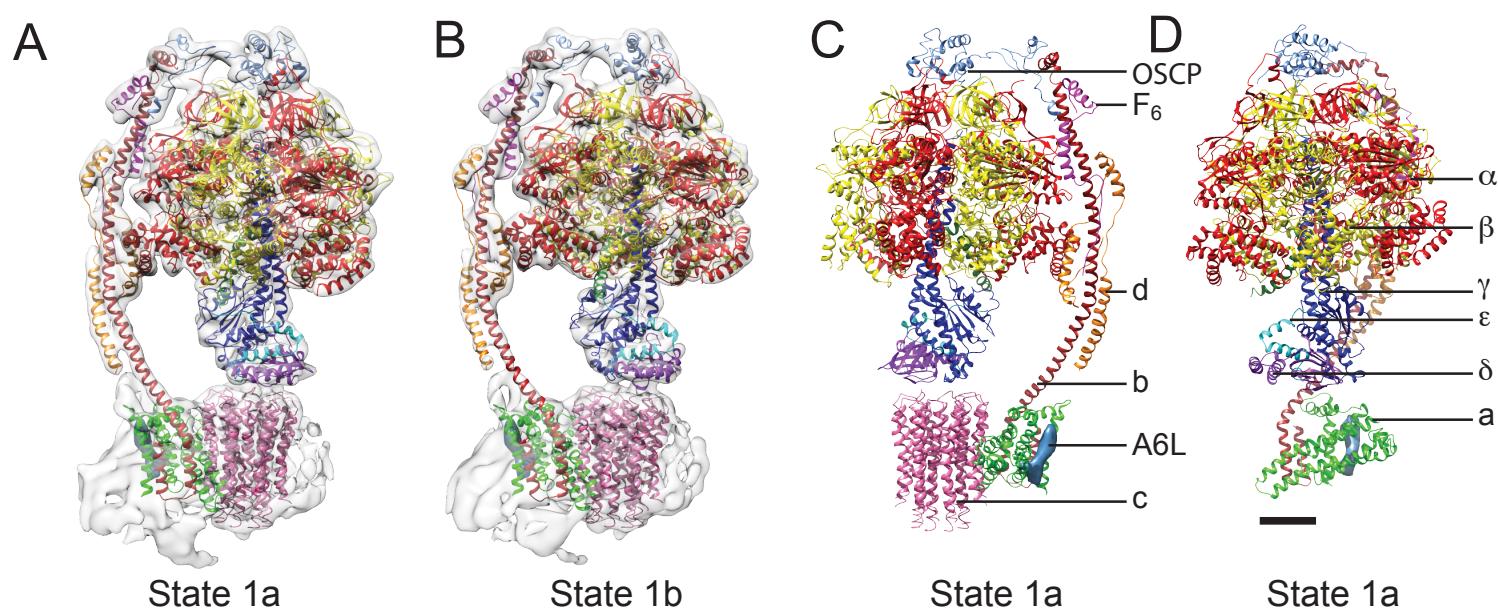

Figure 3



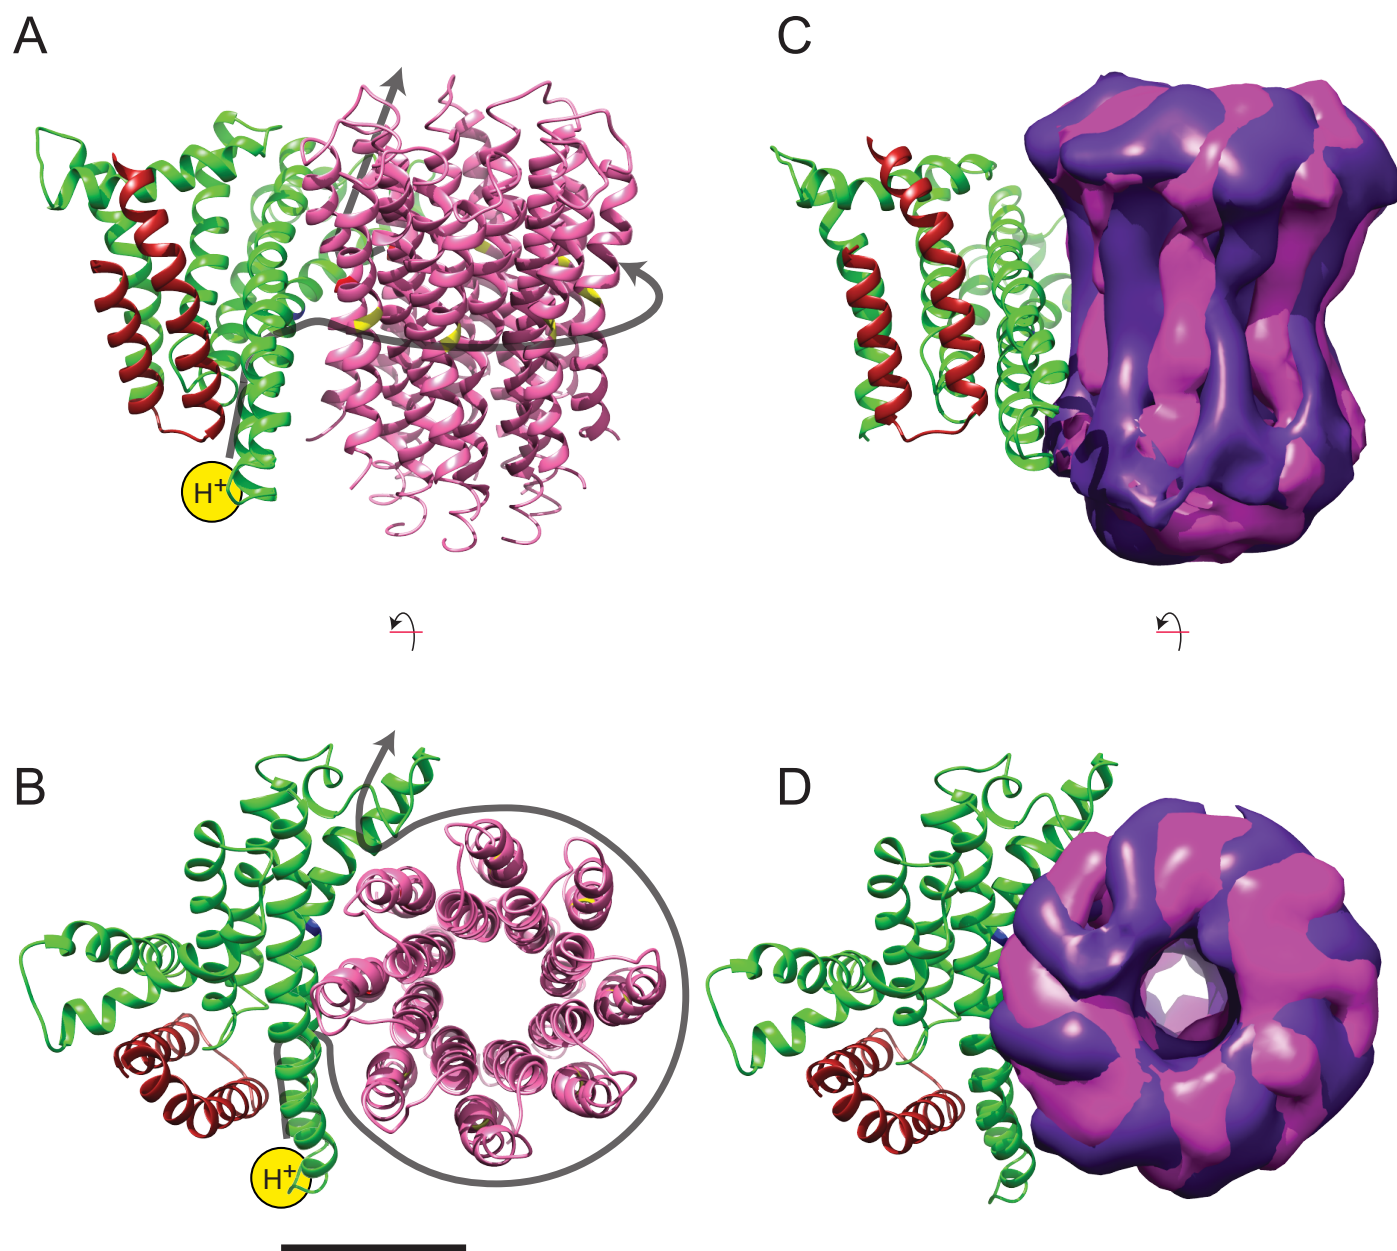

Figure 4

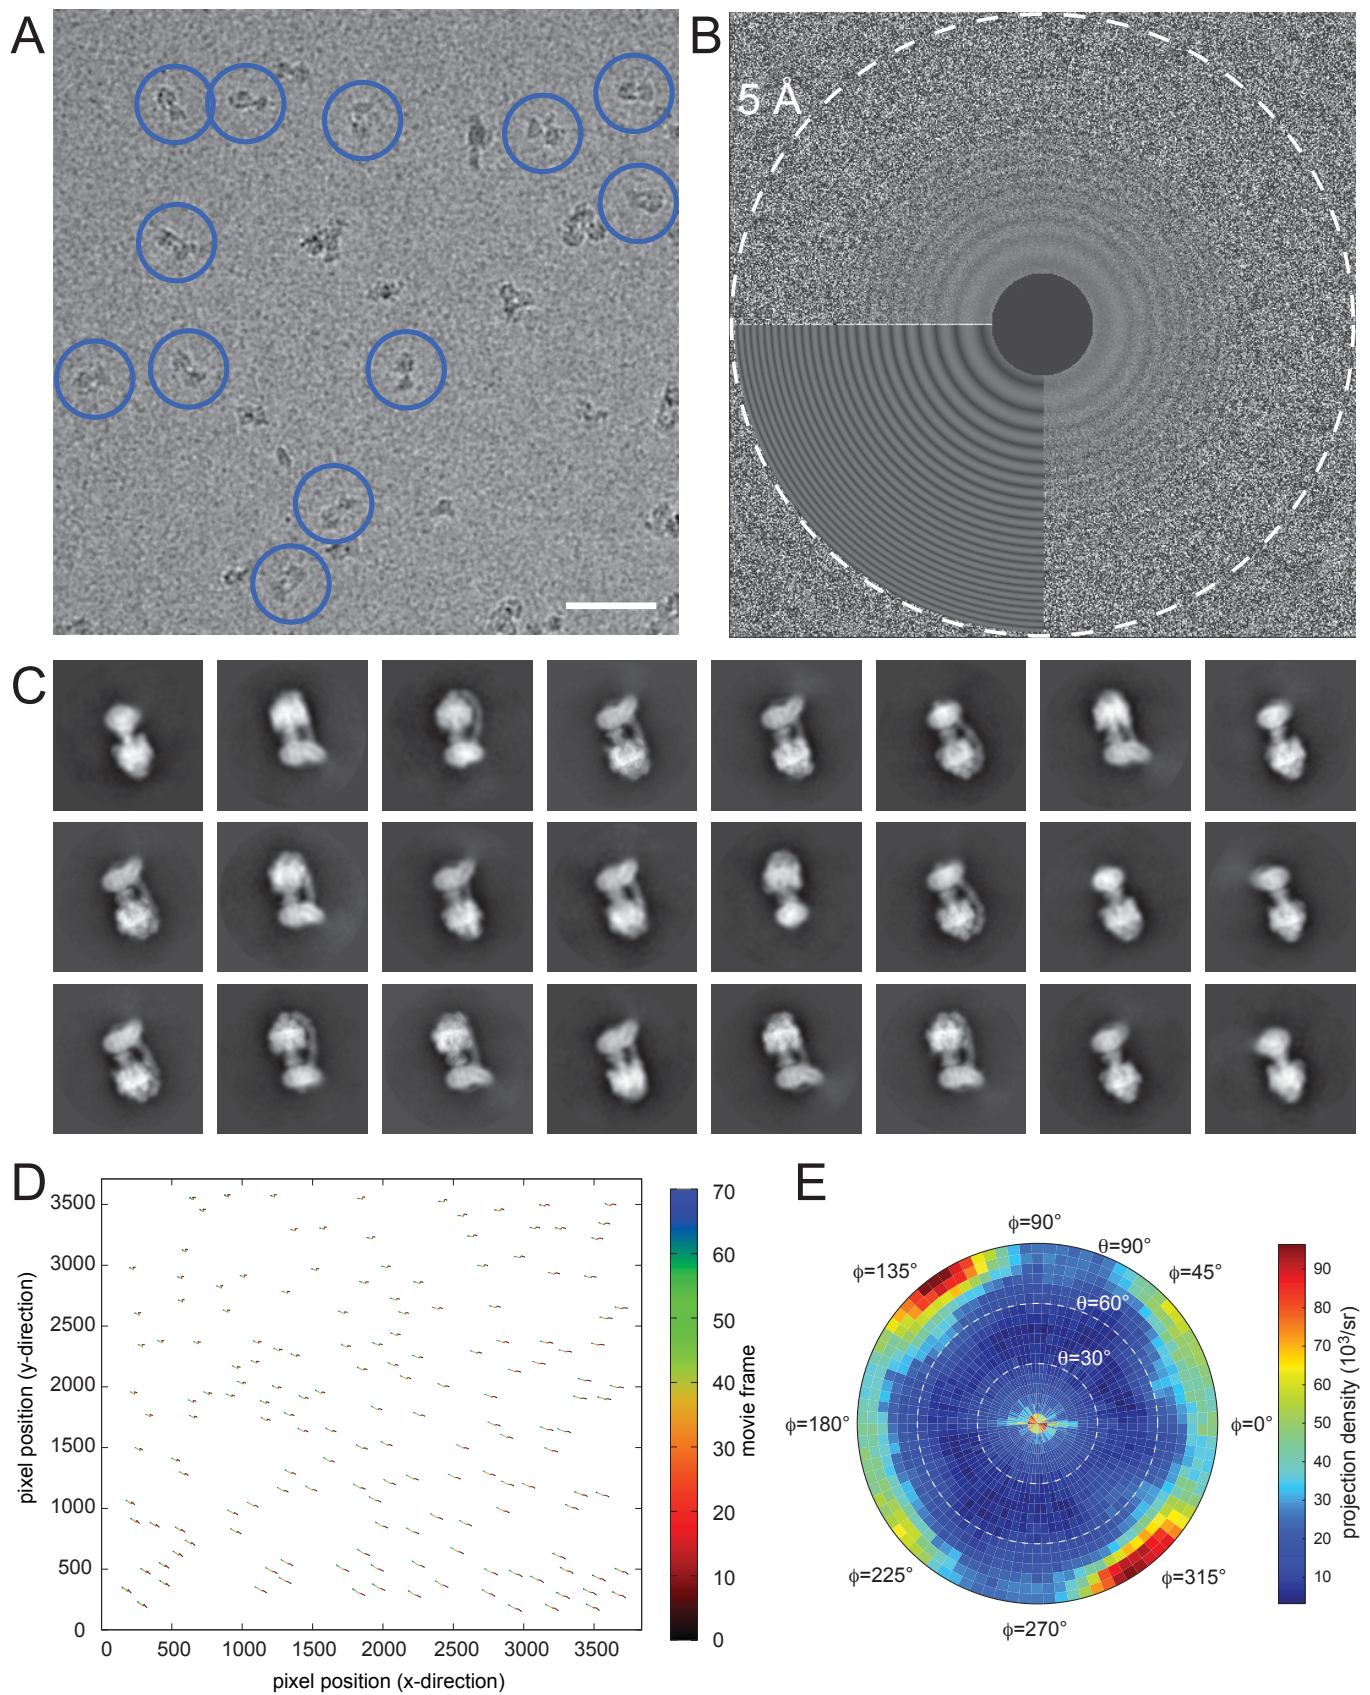

Figure 1 - Supplement 1



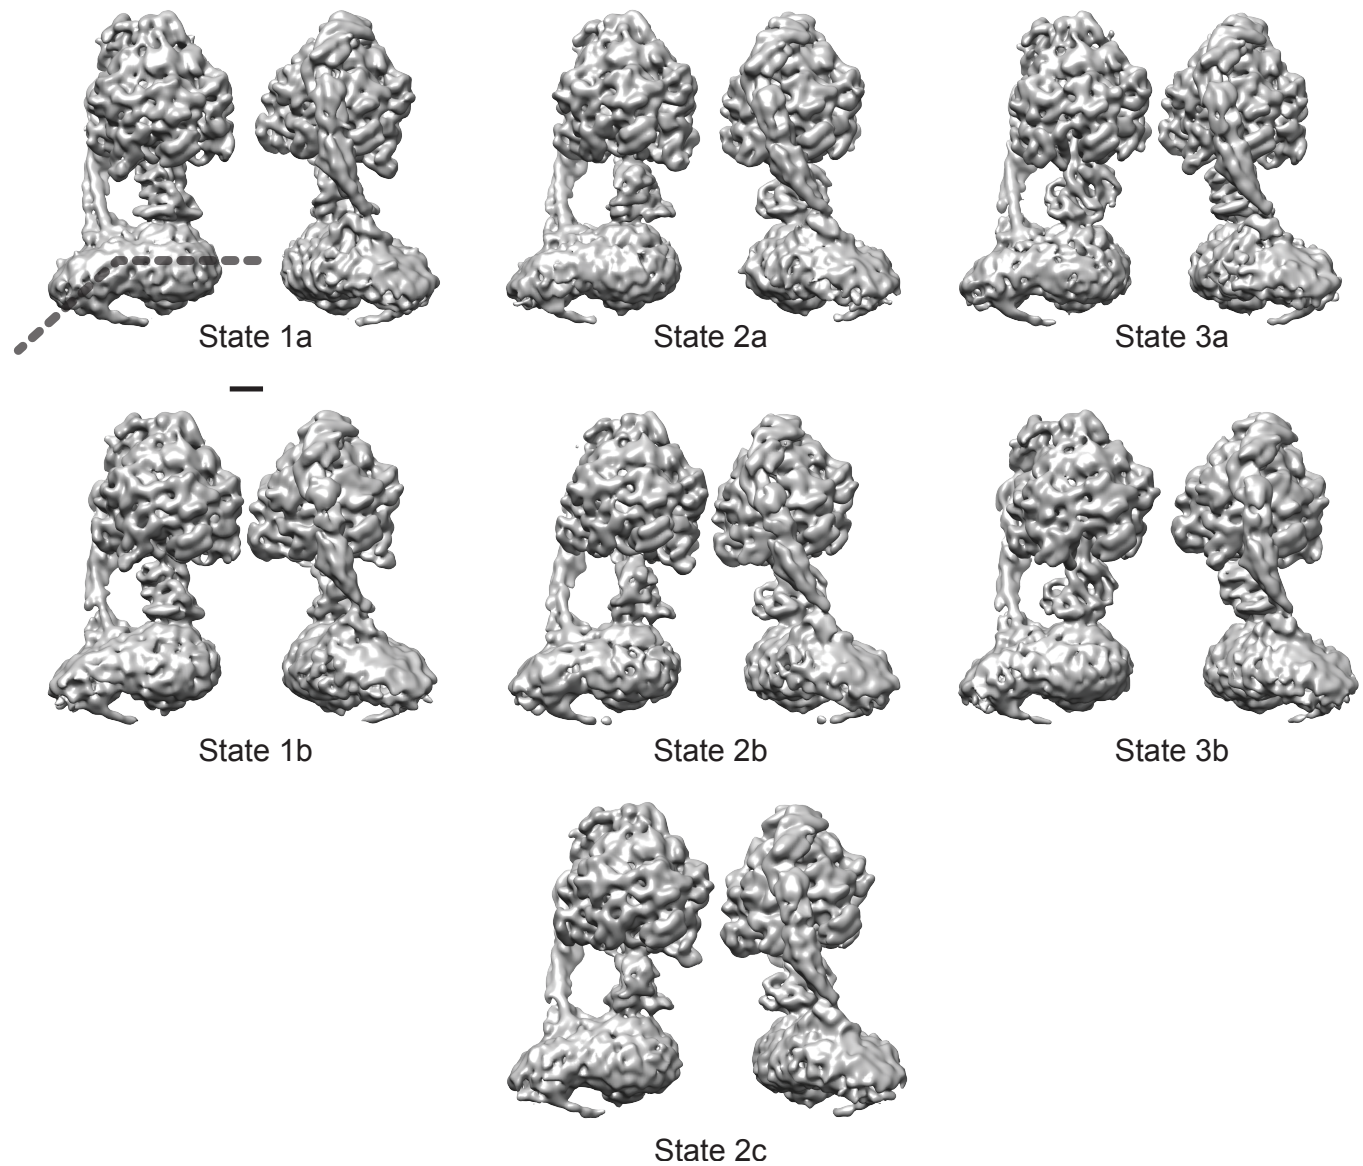

Figure 1 - Supplement 2

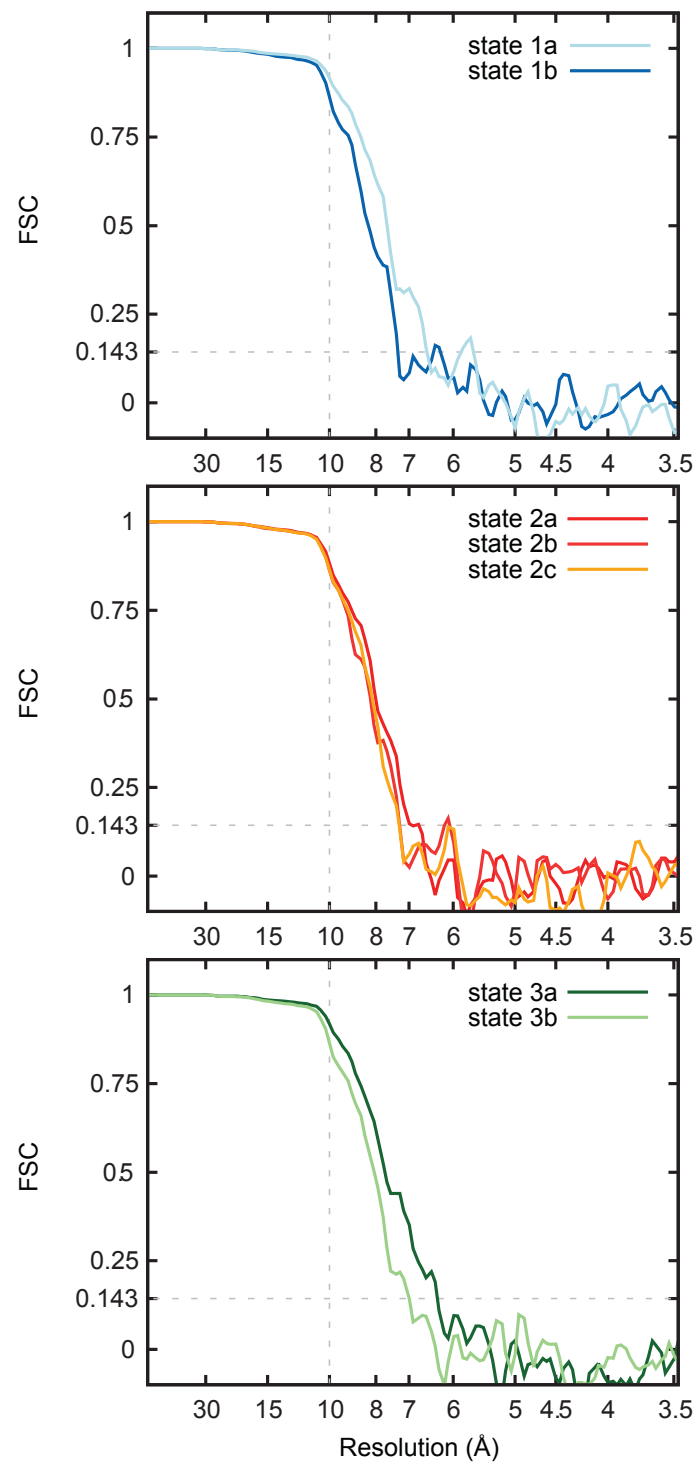

Figure 1 - Supplement 3

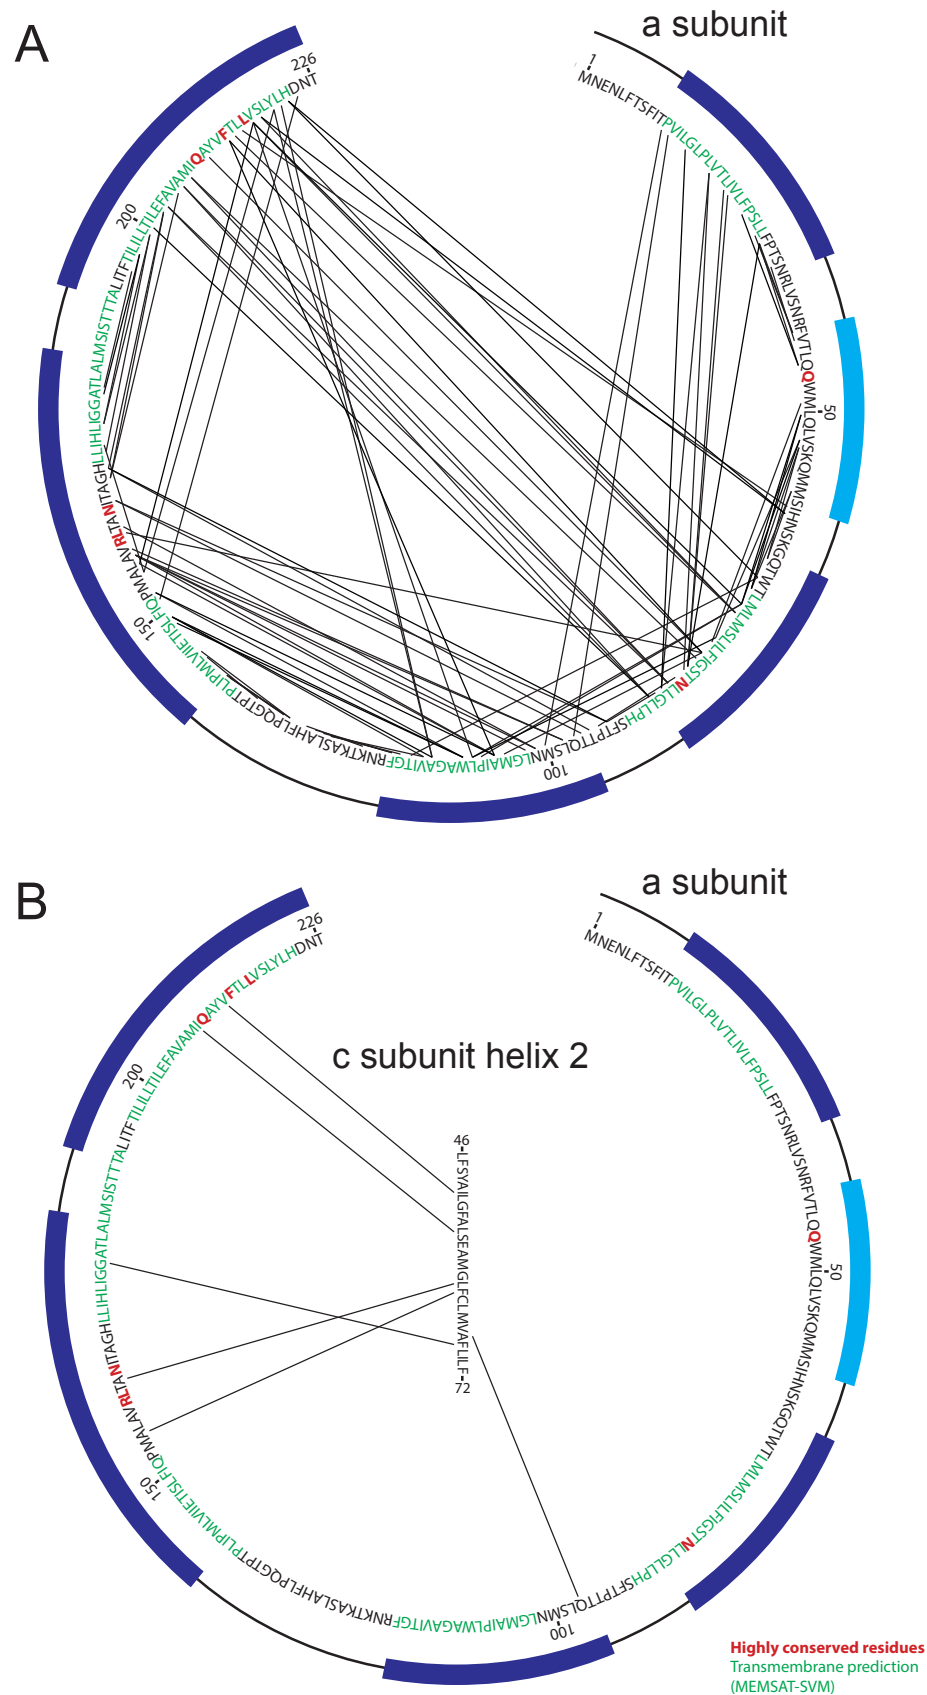

Figure 2 - Supplement 1



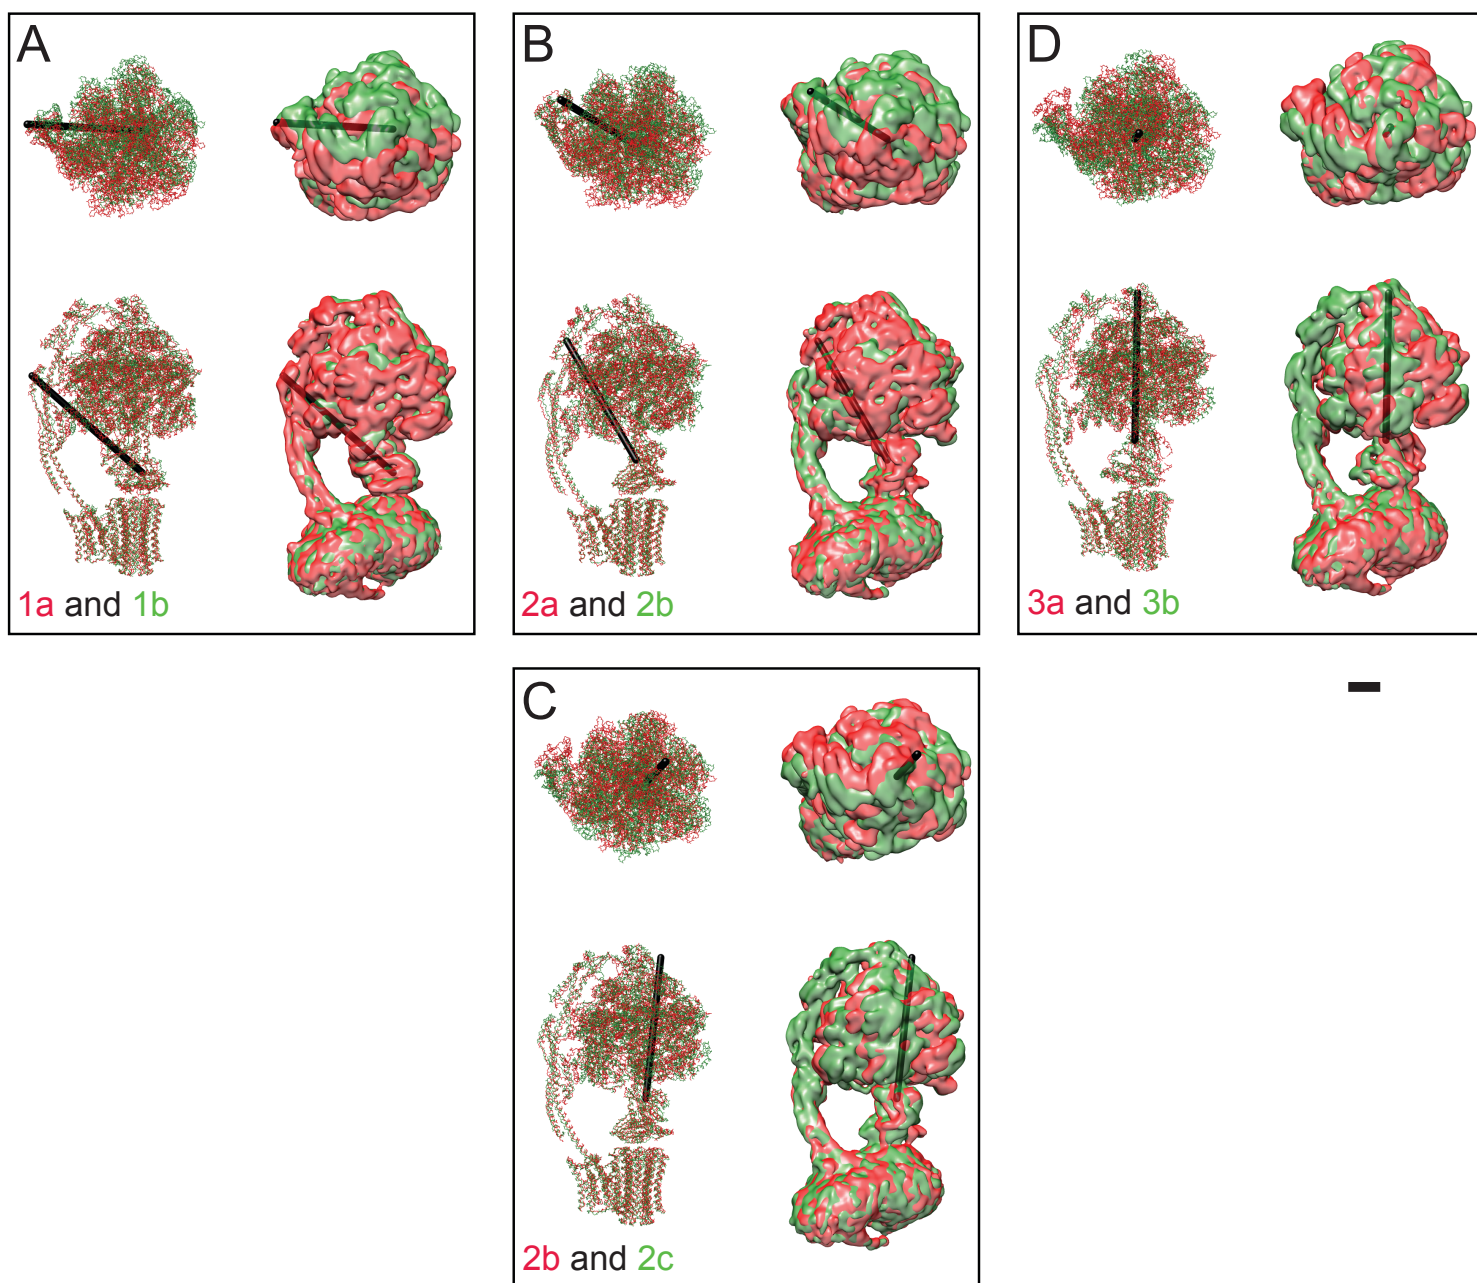

Figure 3 - Supplement 1
